# Supplementary material for: TRPV4 disrupts mitochondrial transport and causes axonal degeneration via a CaMKII-dependent elevation of intracellular Ca2+
Source: PubMed Central journal article supplement (PMC7260201; doi:10.1038/s41467-020-16411-5), 2020-05-29
Supplement: 41467_2020_16411_MOESM1_ESM.pdf [file 41467_2020_16411_MOESM1_ESM.pdf]

Supplementary Materials for Woolums et al.

**TRPV4 disrupts mitochondrial transport and causes axonal degeneration via a CaMKII-dependent elevation of intracellular Ca<sup>2+</sup>**

\*Correspondence to: [csumner1@jhmi.edu](mailto:csumner1@jhmi.edu) and [tlloyd4@jhmi.edu](mailto:tlloyd4@jhmi.edu)

**Supplementary Figures 1 through 13**

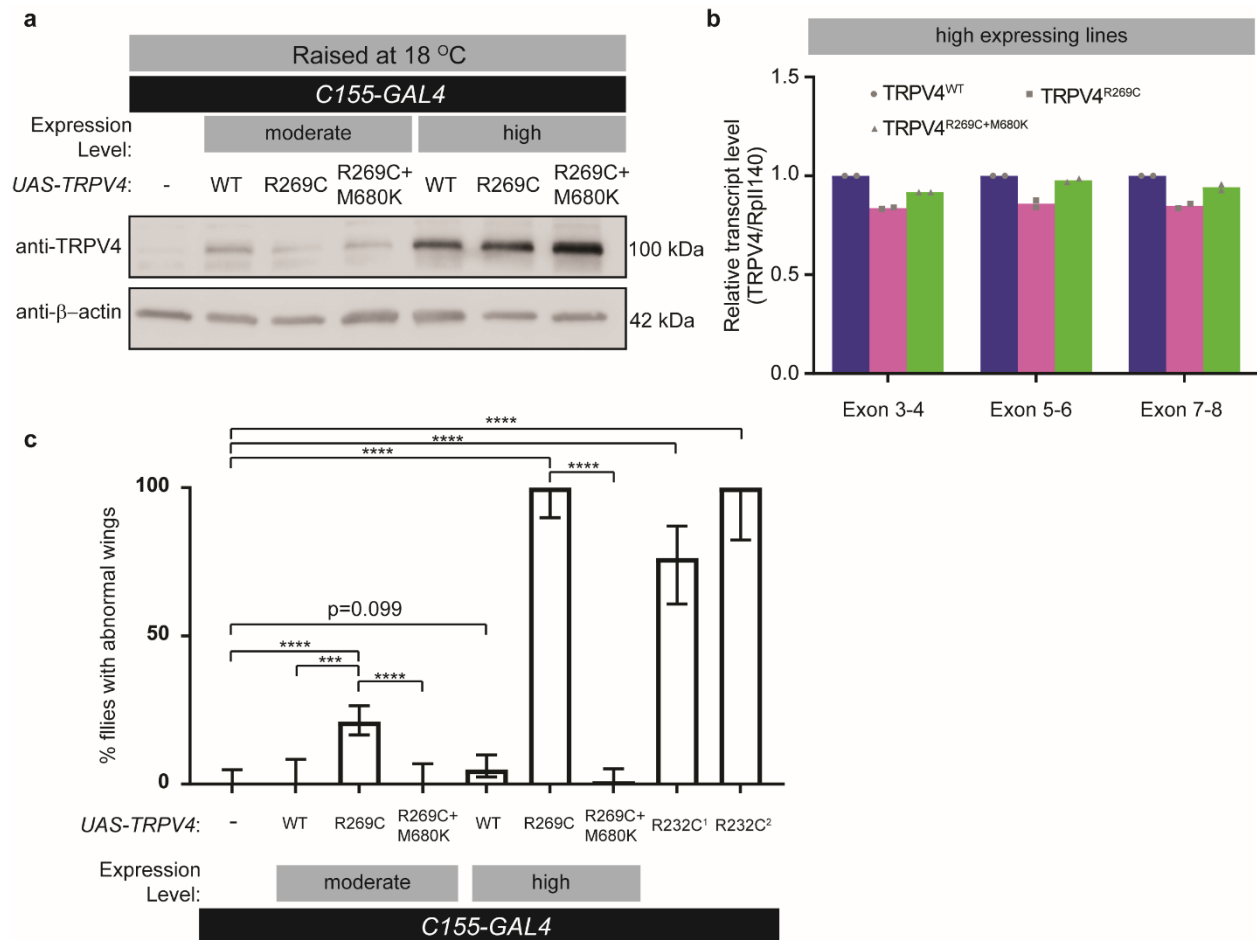

**Supplementary Figure 1. Multiple neuropathy-associated TRPV4 mutant lines induce neurotoxicity. (a)** Western blots of TRPV4 and  $\beta$ -actin from *Drosophila* head lysates prepared from flies expressing indicated TRPV4 variants raised at 18°C. Similar results observed across n=2 biological replicates. **(b)** RT-qPCR quantification of relative TRPV4 transcript from high expressing lines. Mean  $\pm$  SEM. n=2 per genotype. **(c)** Percentage  $\pm$  95% CI of flies with unexpanded wings from the lines in the western blot shown in A as well as two additional transgenic lines carrying the neuropathy-associated R232C mutation. From left to right n=75, 42, 265, 52, 141, 34, 105, 29, and 18 flies.  $\chi^2$ -test (p<0.0001) followed by pairwise two sided Fisher's exact test. For all panels: \*\*\*=p<0.001, and \*\*\*\*=p<0.0001

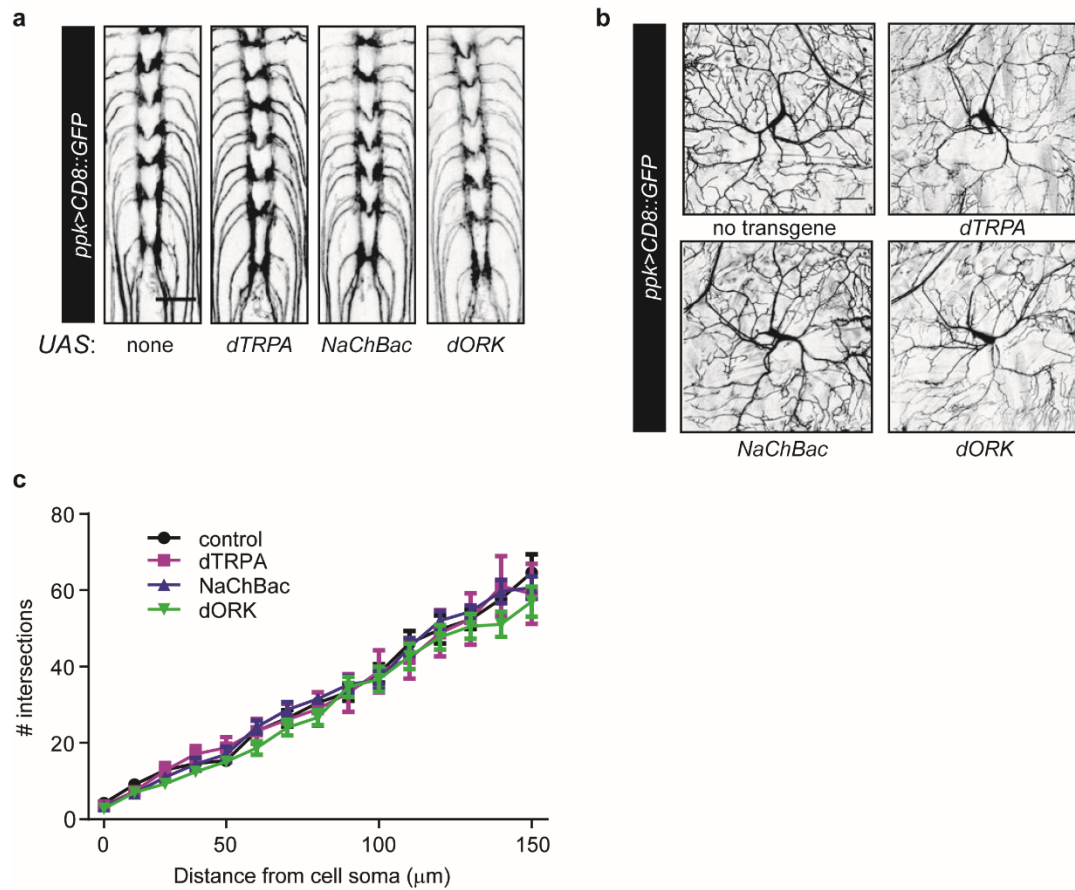

**Supplementary Figure 2. Overexpression of known excitability modifiers does not cause axonal or dendritic degeneration.** Confocal stacks of axonal projections (**a**) and dendrites (**b**) in C4da neurons overexpressing *Drosophila* TRPA (dTRPA), a bacterial sodium channel (NaChBac), or *Drosophila* Open Rectifier Potassium channel (dORK). Scale bar, 25  $\mu\text{m}$  in **a** and 50 $\mu\text{m}$  in **b**. (**c**) Sholl analysis of neurons in F. n= 8 (control), 8 (dTRPA), 7 (NaChBac), and 9 (dORK) Two-way ANOVA ( $p>0.99$ ).

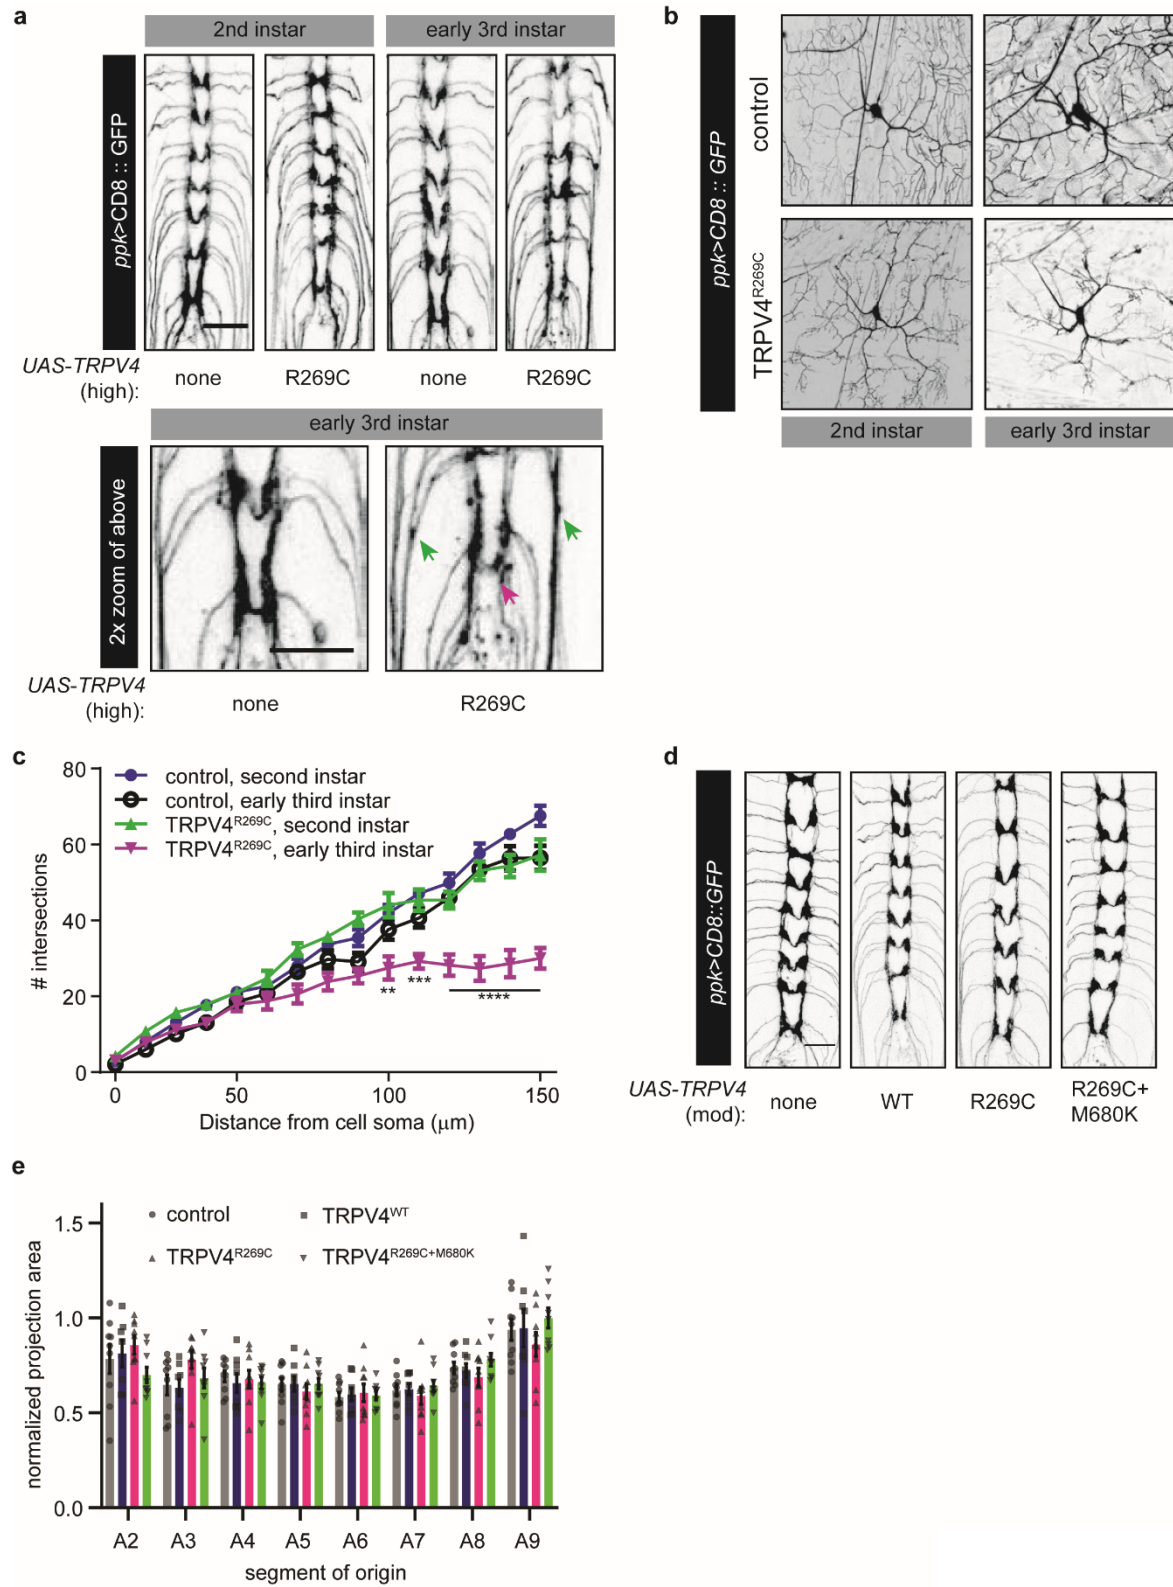

**Supplementary Figure 3. Morphological phenotypes mediated by *TRPV4<sup>R269C</sup>* (high) manifest late in development and are not phenocopied by *TRPV4<sup>R269C</sup>* (mod). Confocal**

projections of **(a)** axonal projections and **(b)** dendrites in second instar and early third instar larvae expressing no TRPV4 or TRPV4<sup>R269C</sup>(high). 2x zoom in A shows a magnified image of posterior projections from the third instar control and TRPV4<sup>R269C</sup> larvae above. Green arrows denote axonal swellings. Magenta arrow denotes fragmentation of projections. **(c)** Sholl analysis of the neurons in **b**. Mean  $\pm$  SEM. For no TRPV4 second instar and third instar n= 9 and 8, respectively. For TRPV4<sup>R269C</sup>, n= 8 per time point. Two-way ANOVA ( $p < 0.0001$ ), Tukey's *post hoc* test. Asterisks indicate comparison of third instar no TRPV4 larvae to third instar TRPV4<sup>R269C</sup> larvae. **(d)** Confocal projections of C4da neuron axonal projections in larvae expressing TRPV4(mod) variants. **(e)** Quantification of normalized projection area in D. Mean  $\pm$  SEM. n= 9 (no TRPV4), 8 (TRPV4<sup>WT</sup>), 9 (TRPV4<sup>R269C</sup>), 9 (TRPV4<sup>R269C+M680K</sup>). Two-way ANOVA ( $p = 0.48$ ). Scale bar, 25  $\mu\text{m}$  in A, D, and G, 50  $\mu\text{m}$  in B and E. For all panels: \*\*= $p < 0.01$ , \*\*\*= $p < 0.001$ , and \*\*\*\*= $p < 0.0001$

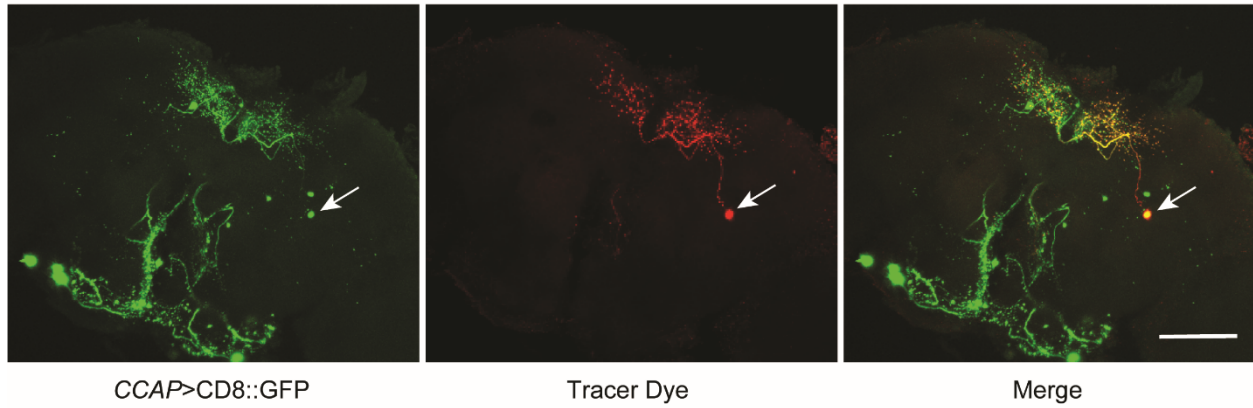

**Supplementary Figure 4. Confirmation of recording from  $N_{CCAP}$ .** Confocal projections of  $N_{CCAP}$  labeled by CD8::GFP, tracer dye (red, injected after recording), and their colocalization. White arrow indicates CD8::GFP positive cell body co-localized with the tracer dye. Similar results observed across  $n=5$  *Drosophila* brains. Scale bar, 100  $\mu$ m.

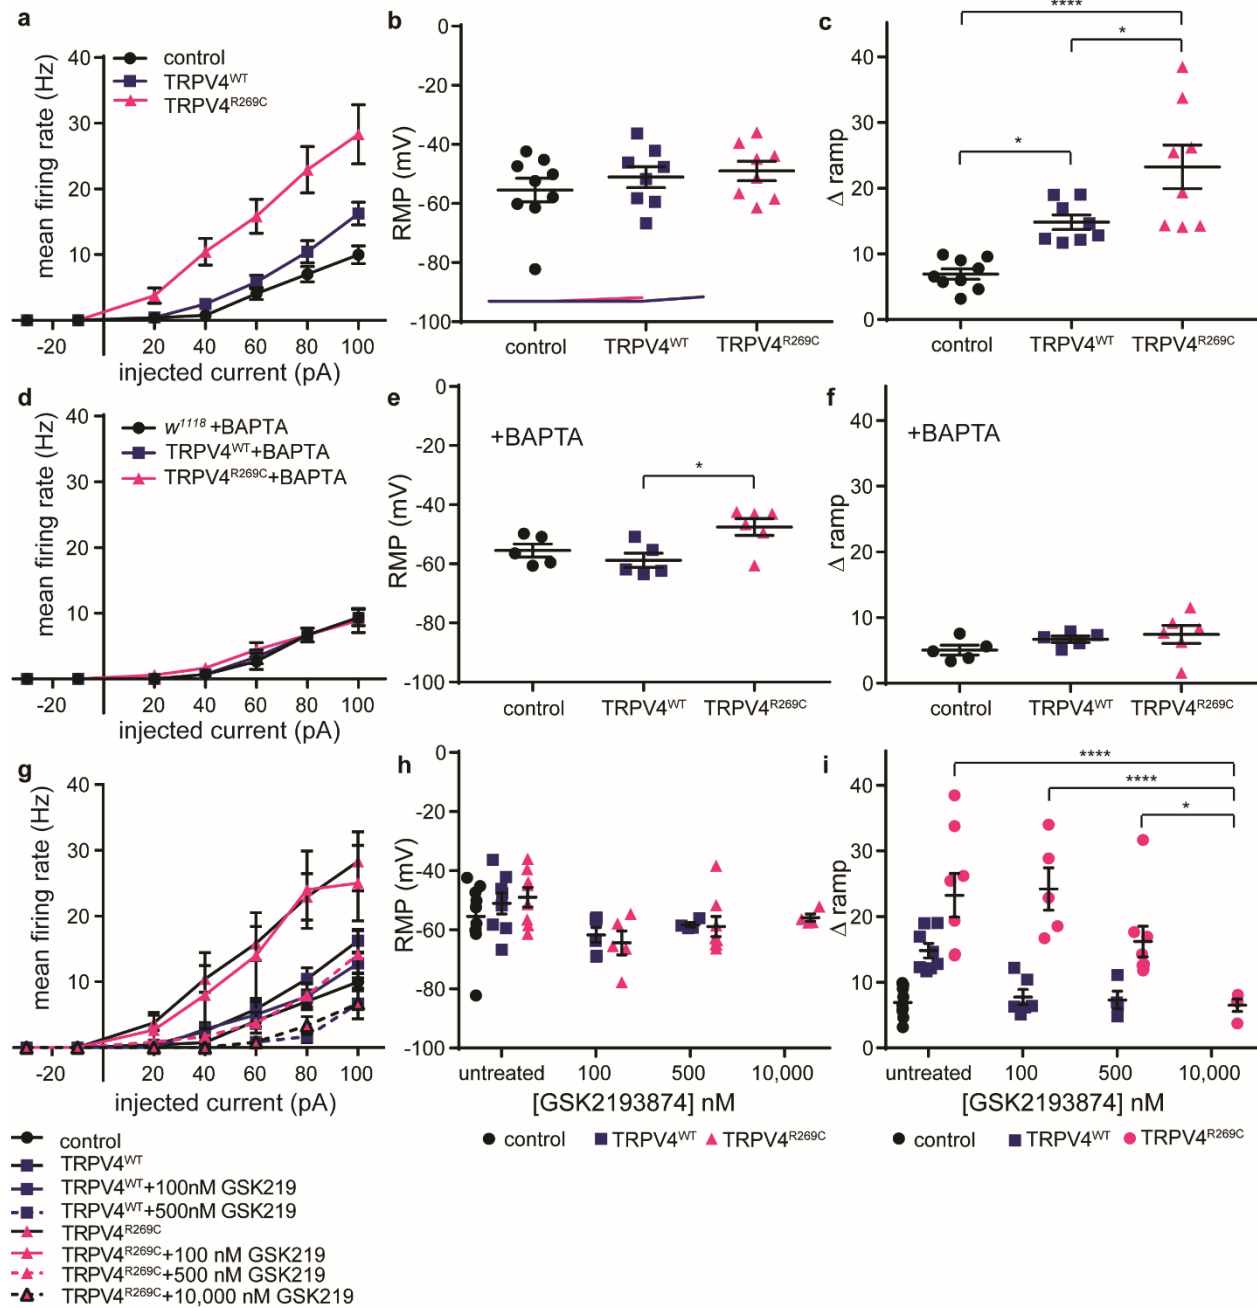

**Supplementary Figure 5. TRPV4<sup>R269C</sup> activity increases neuronal excitability in a Ca<sup>2+</sup>-**

**dependent manner.** Evoked mean firing rate in response to inject current (**a**), resting membrane potential (RMP) (**b**), and membrane potential variability ( $\Delta$  ramp) (**c**) in flies of the indicated genotypes. Mean  $\pm$  SEM. For B-D, n = 9 (no TRPV4), 8 (TRPV4<sup>WT</sup>), and 8 (TRPV4<sup>R269C</sup>). **a:** Two-way ANOVA ( $p < 0.0001$ ), Tukey's *post hoc* test. Asterisks indicate

difference from control. **b**: One-way ANOVA ( $p=0.45$ ). **c**: One-way ANOVA ( $p<0.0001$ ), Tukey's *post hoc* test. Evoked firing rate (**d**), RMP (**e**) and  $\Delta$  ramp (**f**) in flies of the indicated genotypes when treated with 5 mM BAPTA. Mean  $\pm$  SEM. For **d-f**,  $n=5$  (no TRPV4), 5 (TRPV4<sup>WT</sup>) and 6 (TRPV4<sup>R269C</sup>). **d**: Two-way ANOVA ( $p=0.99$ ). **e**: One-way ANOVA ( $p=0.021$ ), Tukey's *post hoc* test. **f**: One-way ANOVA ( $p=0.27$ ). Evoked mean firing rate (**g**), RMP (**h**), and  $\Delta$  ramp (**i**) after bath application of GSK219 for 1 hour at the indicated concentrations. Mean  $\pm$  SEM. For **g-i**, TRPV4<sup>WT</sup>  $n=8, 6$  and  $4$  for  $0, 100,$  and  $500$  nM. TRPV4<sup>R269C</sup>  $n=8, 5, 8,$  and  $4$  for  $0, 100, 500$  and  $10,000$  nM. **h**: One-way ANOVA, TRPV4<sup>WT</sup> ( $p=0.059$ ), TRPV4<sup>R269C</sup> ( $p<0.031$ ), Tukey's *post hoc* test. **i**: One-way ANOVA, TRPV4<sup>WT</sup> ( $p=0.0004$ ), TRPV4<sup>R269C</sup> ( $p=0.0044$ ), Tukey's *post hoc* test. For all panels: \*= $p<0.05$ , \*\*= $p<0.01$ , \*\*\*= $p<0.001$ , \*\*\*\*= $p<0.0001$ .



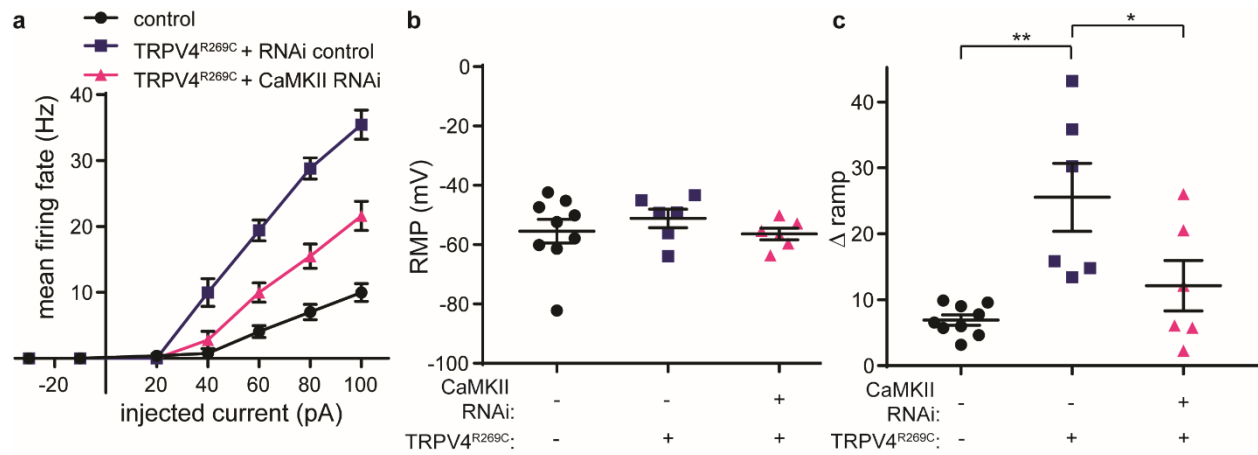

**Supplementary Figure 6. TRPV4<sup>R269C</sup> activity increases neuronal excitability in a CaMKII-**

**dependent manner.** Evoked mean firing rate **(a)**, RMP **(b)**, and  $\Delta$  ramp **(c)** in flies of the

indicated genotypes. Mean  $\pm$  SEM, n =8, 6, and 6. **a:** Two-way ANOVA ( $p < 0.0001$ ), Tukey's

*post hoc* test, asterisks indicate difference from TRPV4<sup>R269C</sup>+RNAi control. **b:** One-way ANOVA

( $p = 0.58$ ). **c:** One-way ANOVA ( $p = 0.0004$ ), Tukey's *post hoc* test. For all panels: \*= $p < 0.05$ ,

\*\*= $p < 0.01$ , \*\*\*= $p < 0.001$ , \*\*\*\*= $p < 0.0001$ .

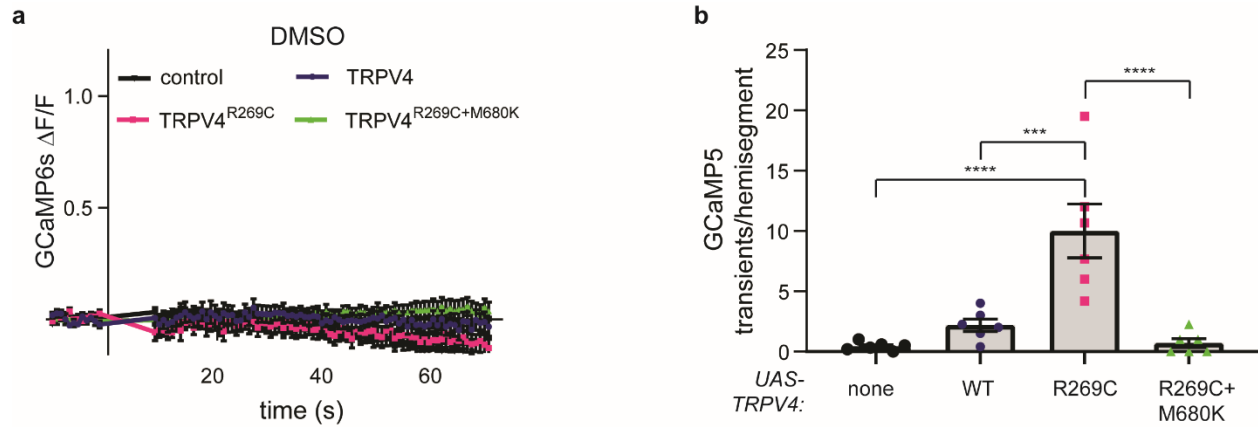

**Supplementary Figure 7. Intracellular Ca<sup>2+</sup> in C4da neurons expressing TRPV4 variants.**

**(a)** GCaMP6S  $\Delta F/F$  over time in C4da neurons expressing TRPV4 variants upon DMSO addition at t=0s. DMSO does not increase intracellular calcium. **(b)** Quantitation of spontaneous GCaMP5 signals in larval ventral nerve cord of animals expressing TRPV4(mod). Calcium transients per hemisegment per minute were counted (at least 3 hemisegments per animal). Mean  $\pm$  SEM. n = 6 per genotype. One-way ANOVA ( $p < 0.0001$ ), Tukey's *post hoc* test. For all panels: \*\*\*= $p < 0.001$ , \*\*\*\*= $p < 0.0001$ .

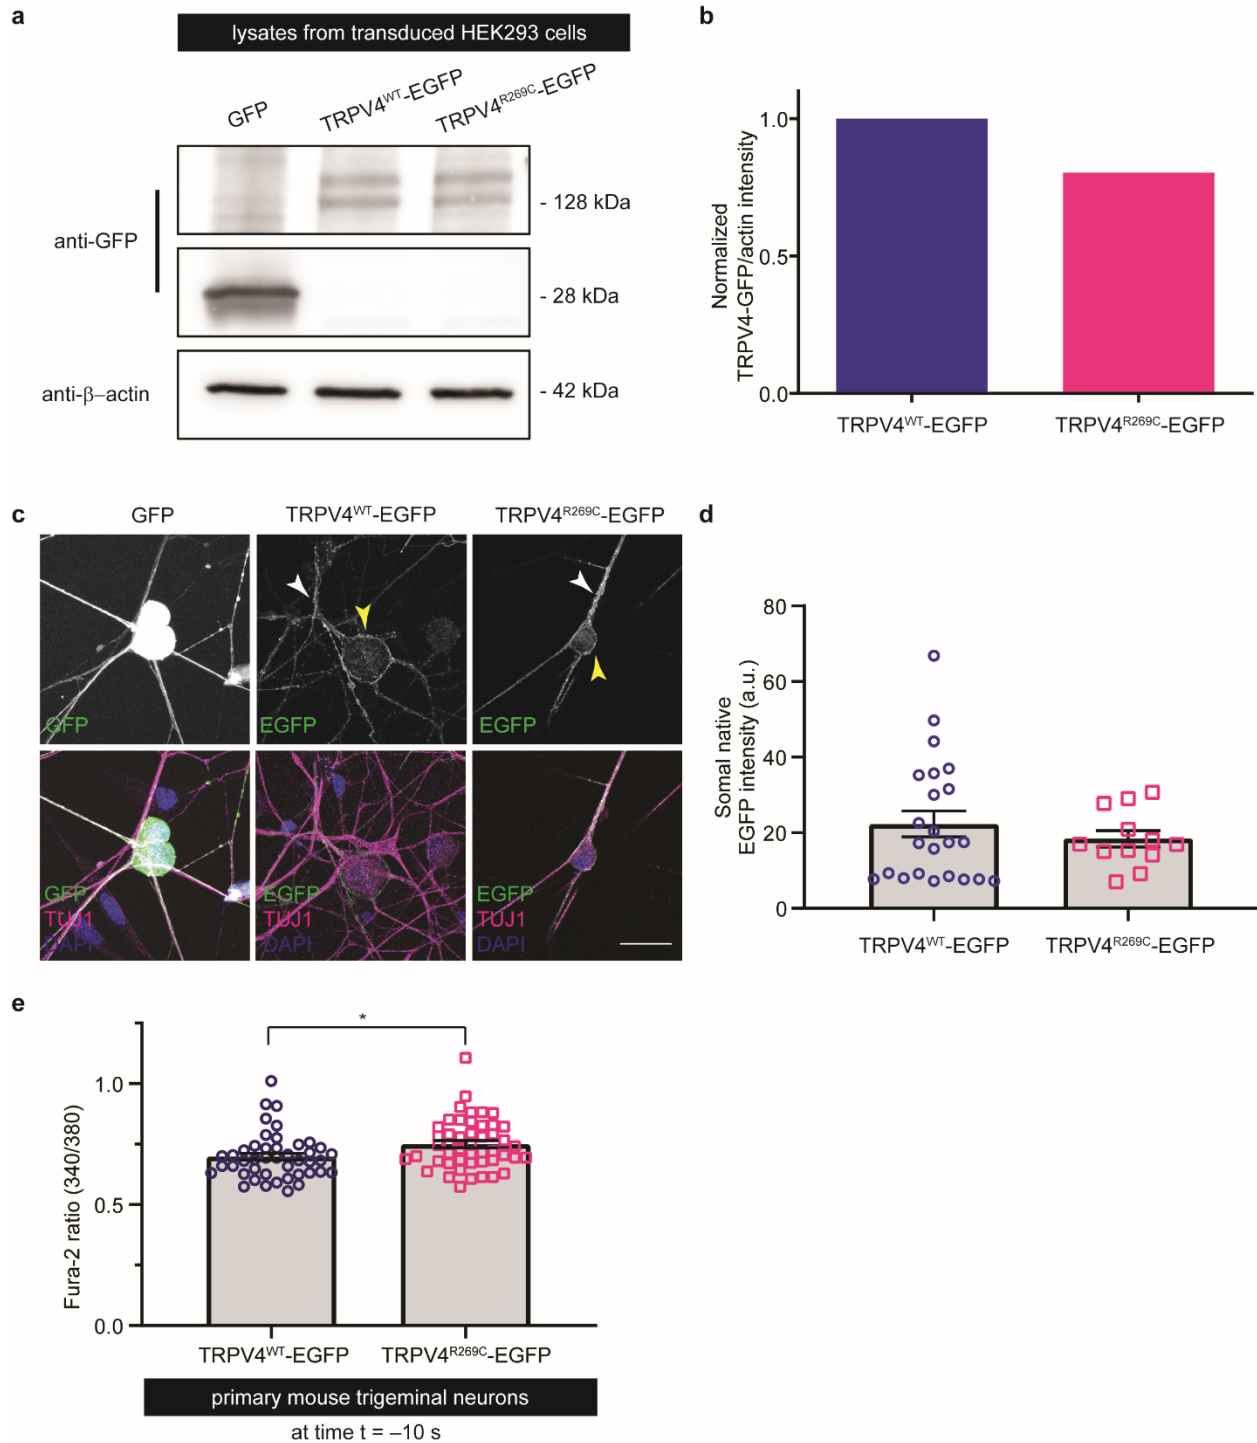

**Supplementary Figure 8. TRPV4 localizes to the cell cortex of primary neurons and TRPV4<sup>R269C</sup> slightly elevates basal calcium.** (a) Western blots of GFP and  $\beta$ -actin from HEK293T cell lysates prepared from cells transduced with GFP, TRPV4<sup>WT</sup>-EGFP or TRPV4<sup>R269C</sup>-EGFP. (b) Ratio of anti-GFP to anti- $\beta$ -actin signal in a. (c) Confocal images of

primary trigeminal neurons transduced with lentivirus to express GFP, TRPV4<sup>WT</sup>-EGFP, or TRPV4<sup>R269C</sup>-EGFP. Yellow arrows: TRPV4<sup>WT</sup>-EGFP membrane enrichment, white arrow: localization of TRPV4<sup>WT</sup>-EGFP to neuronal processes. Scale bar, 25  $\mu$ m. **(d)** From a separate experiment, quantification of trigeminal neuron somal native EGFP intensity in neurons transduced to express TRPV4<sup>WT</sup>-EGFP or TRPV4<sup>R269C</sup>-EGFP. Mean  $\pm$  SEM. n = 23 and 12 cells for TRPV4<sup>WT</sup>-EGFP and TRPV4<sup>R269C</sup>-EGFP, respectively. Unpaired two-tailed t-test ( $p = 0.42$ ). **(e)** Quantification of Fura-2AM 340/380 ratio at t = -10 s from **Fig.5d**. Mean  $\pm$  SEM. n = 44 and 48 cells for TRPV4<sup>WT</sup>-EGFP and TRPV4<sup>R269C</sup>-EGFP, respectively. Unpaired two-tailed t-test. \* $p=0.0146$ .

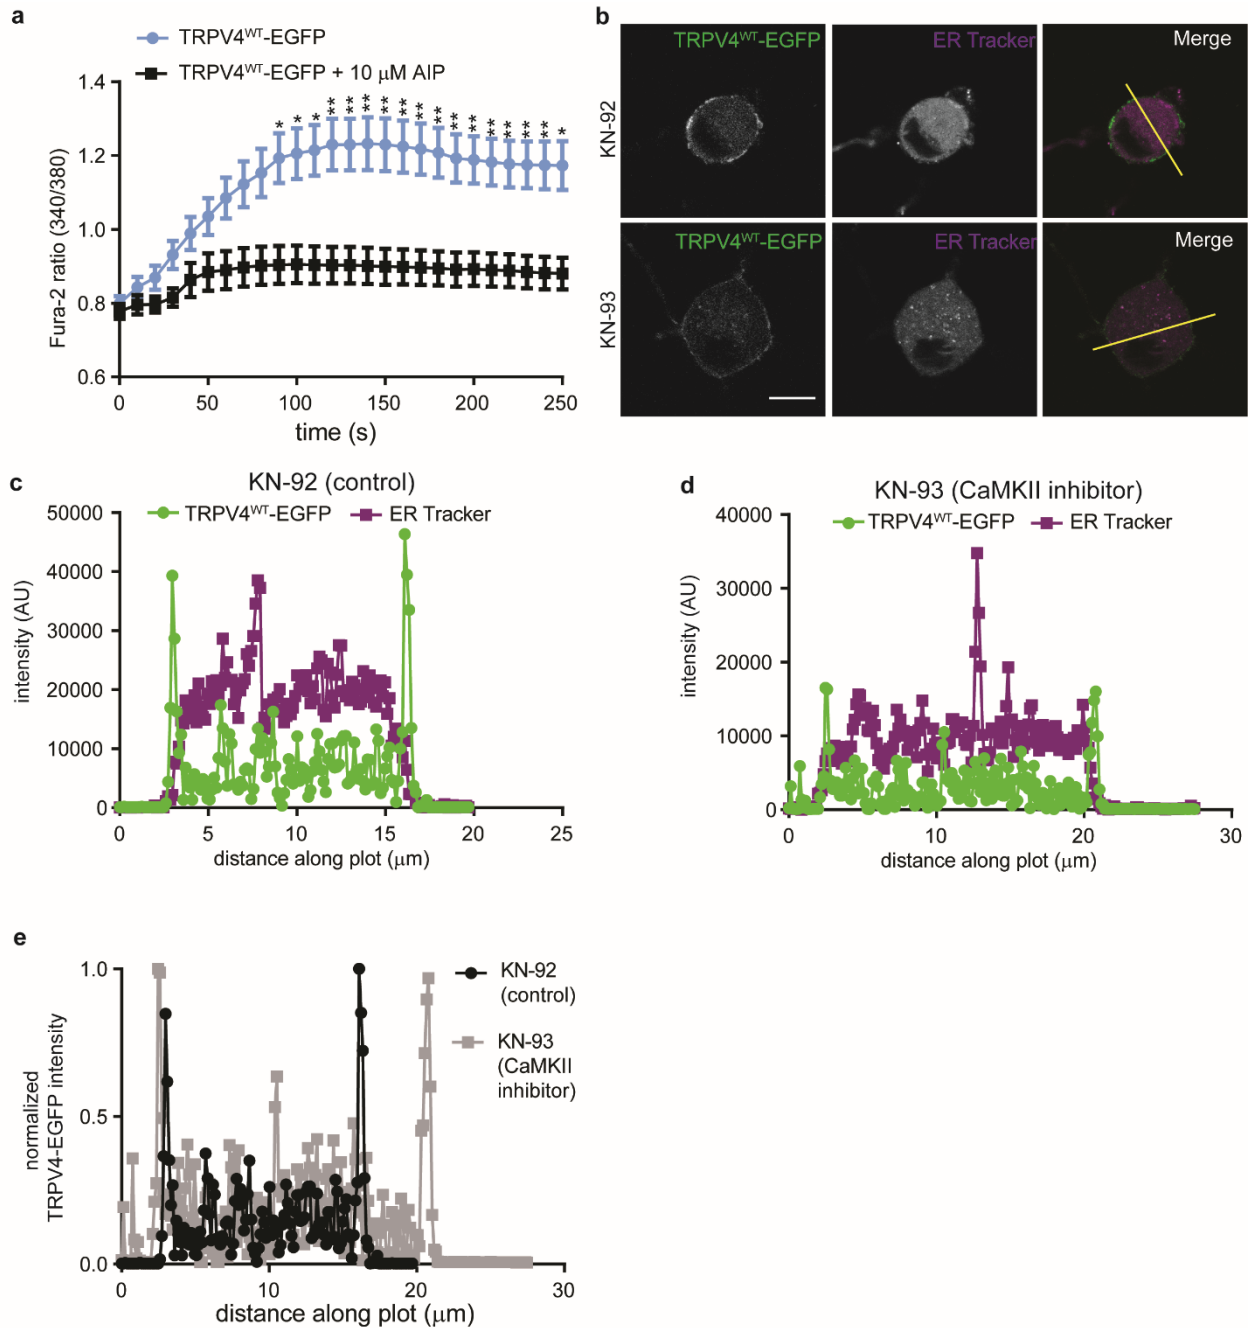

**Supplementary Figure 9. CaMKII does not alter TRPV4 localization to the cell cortex.**

**(a)** Mean  $\pm$  SEM Fura-2AM ratio over time in neurons transduced to express TRPV4-EGFP and treated with either vehicle or 10  $\mu\text{M}$  autocamtide-2-related inhibitor peptide (AIP) followed by treatment with 30 nM GSK101 at time=0.  $n = 46$  (control) and 37 (AIP) neurons. Two-way ANOVA, Geisser-Greenhouse correction ( $p < 0.0001$ ), Tukey's *post hoc* test.  $* = p < 0.05$ ,  $** = p < 0.01$ .

\*\*\*=p<0.001, \*\*\*\*=p<0.0001 **(b)** Confocal images of primary trigeminal neurons transduced to express TRPV4<sup>WT</sup>-EGFP treated with either 10  $\mu$ M KN-92 or KN-93. Yellow lines indicate the length along which the line scans in panels **c**, **d** and **e** were derived. Scale bar, 25  $\mu$ m. **(c)** Intensity profile of ER-Tracker Red and EGFP in a neuron transduced with TRPV4<sup>WT</sup>-EGFP and treated with 10  $\mu$ M KN-92. **(d)** Intensity profile of ER-Tracker Red and EGFP in a neuron transduced with TRPV4<sup>WT</sup>-EGFP and treated with 10  $\mu$ M KN-93. **(e)** Superimposed normalized traces from **c** and **d**. Values were normalized to the maximum value within either trace.

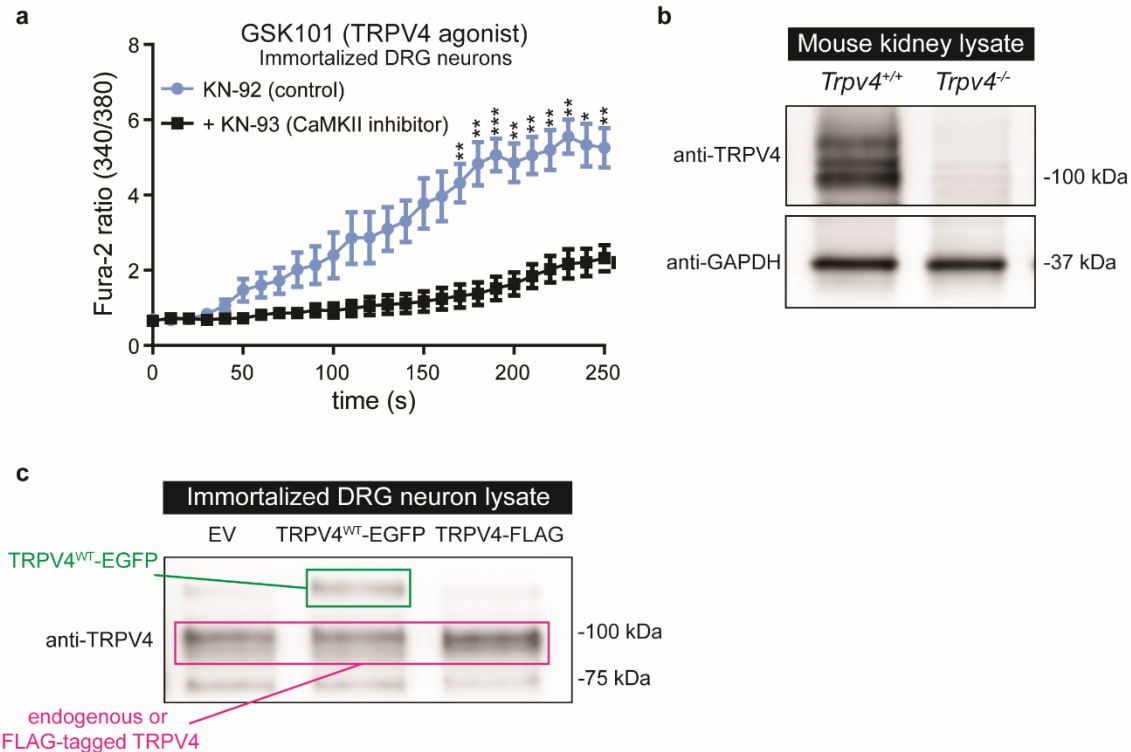

**Supplementary Figure 10. CaMKII inhibition prevents increases in intracellular Ca<sup>2+</sup> mediated by endogenous TRPV4.** (a) Mean  $\pm$  SEM Fura-2AM ratio over time in immortalized rat DRG neurons (50B11 cells) that have been treated for 4 hours with either 10  $\mu$ M KN-92 or 10  $\mu$ M KN-93 followed by stimulation with 30 nM GSK101 at time=0. n=9 coverslips of cells per condition. Two-way ANOVA, Geisser-Greenhouse correction ( $p < 0.0001$ ), Tukey's *post hoc* test. (b) Western blot of mouse kidney lysate from wild type and *Trpv4*<sup>-/-</sup> mice demonstrates antibody specificity. Similar results were observed in 3 separate experiments. (c) Western blot of 50B11 lysates probed with the same antibody as I. Cells were transfected with empty vector (EV), TRPV4-EGFP, or TRPV4-FLAG. Similar results were observed in 3 separate experiments. For all panels: \*= $p < 0.05$ , \*\*= $p < 0.0$ , \*\*\*= $p < 0.001$ , \*\*\*\*= $p < 0.0001$

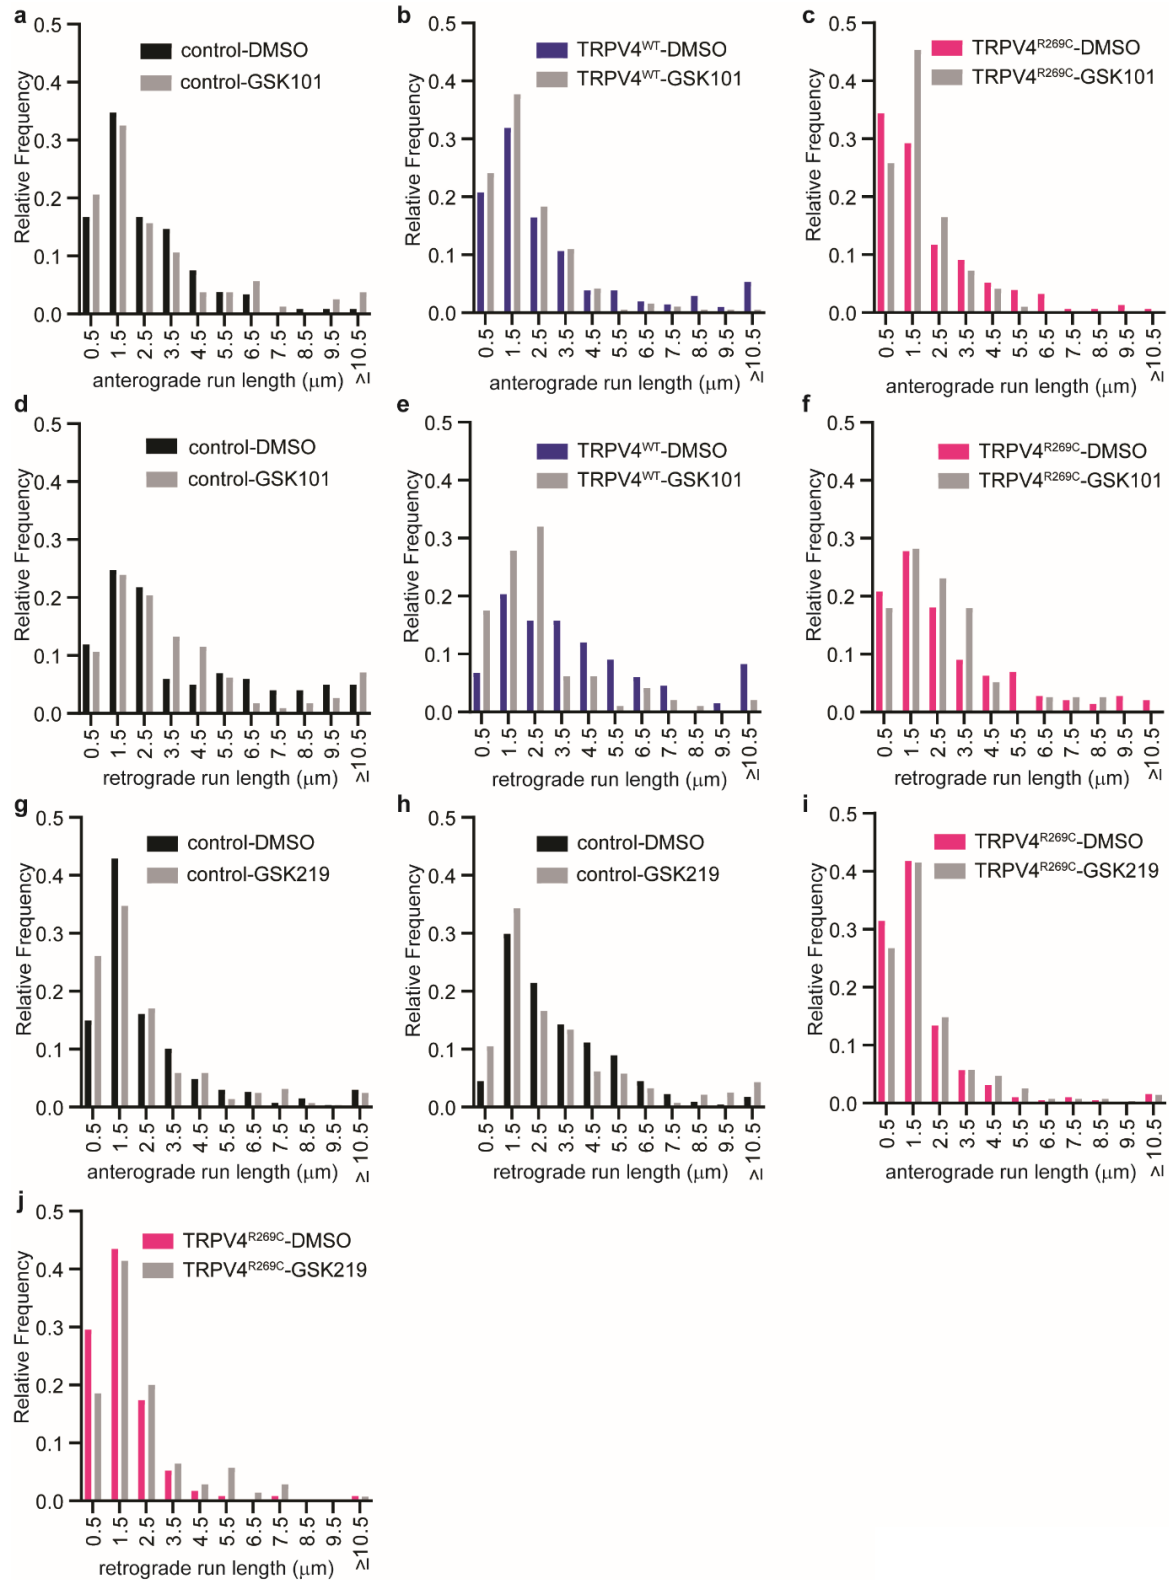

**Supplementary Figure 11. TRPV4 activation causes a modest shift to shorter**

**mitochondrial run lengths.** Histogram of anterograde run lengths in larvae treated with DMSO



or 40 nM GSK101 and expressing **(a)** no TRPV4 (n= 239 (DMSO), 160 (GSK101) runs), **(b)** TRPV4<sup>WT</sup> (n= 207, 191), or **(c)** TRPV4<sup>R269C</sup> (n=154, 97). Histogram of retrograde run lengths in larvae treated with DMSO or 40 nM GSK101 and expressing **(d)** no TRPV4 (n=101, 113), **(e)** TRPV4 (n=133, 97), or **(f)** TRPV4<sup>R269C</sup>(n=144, 39). (G-H) Histograms of mitochondrial run lengths in larvae treated with DMSO or 10  $\mu$ M GSK219 and expressing no TRPV4 in the **(g)** anterograde (n= 268 (DMSO), 288 (GSK219) runs) and **(h)** retrograde (n= 224, 277) directions. Histograms of mitochondrial run lengths in larvae treated with DMSO or 10  $\mu$ M GSK219 and expressing TRPV4<sup>R269C</sup> in the **(i)** anterograde (n= 194, 277) and **(j)** retrograde (n= 115, 140) directions.

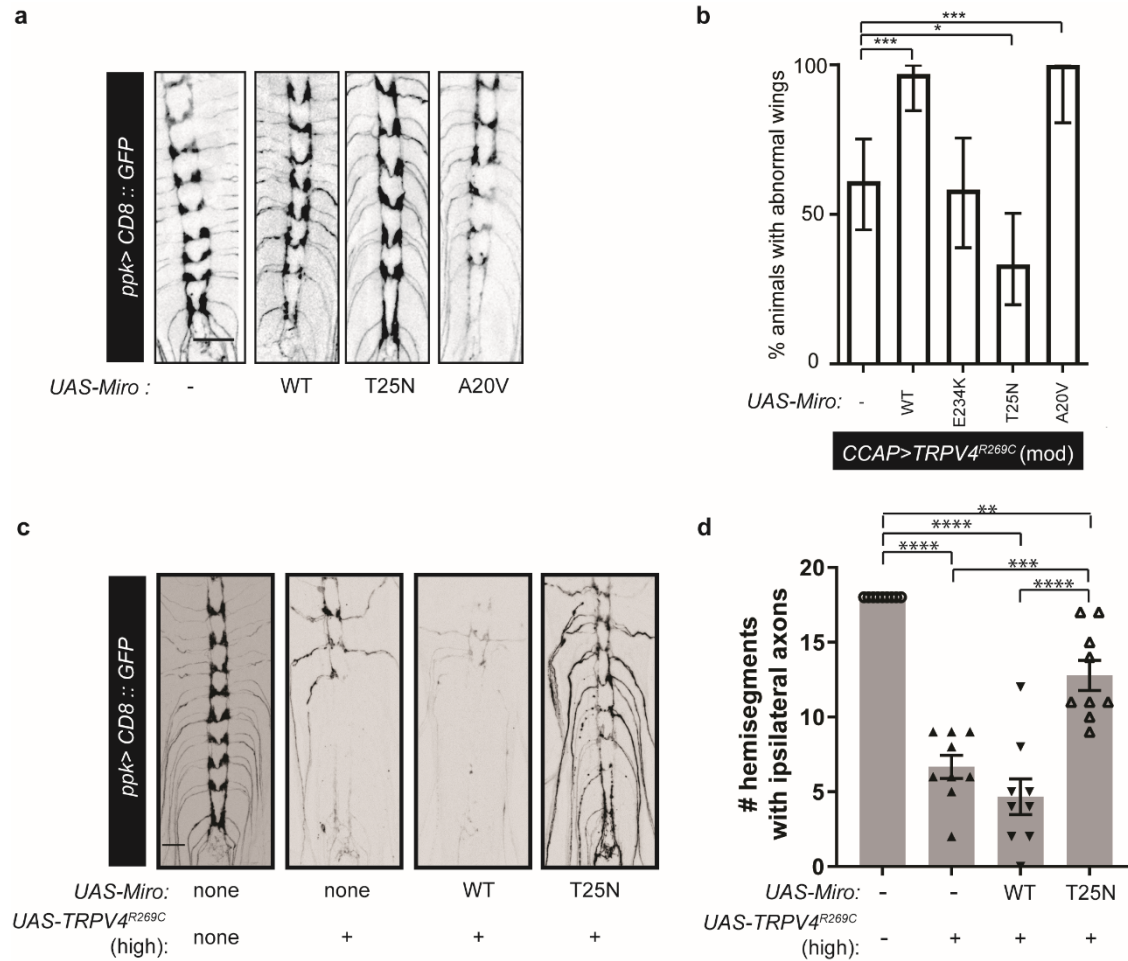

**Supplementary Figure 12. Wild type Miro overexpression does not cause observable axonal degeneration in isolation and overexpression of GDP-bound Miro mildly suppresses TRPV4<sup>R269C</sup>-mediated toxicity. (a)**

Confocal projections of C4da axonal projections in larvae overexpressing wild type Miro, GDP-bound Miro (Miro<sup>T25N</sup>), or GTP-bound Miro (Miro<sup>A20V</sup>).

(b) Percentage ± 95% CI of flies with unexpanded wings when co-expressing TRPV4<sup>R269C</sup>(mod) with Miro variants. From left to right n= 36, 33, 24, 33, and 16 flies. X<sup>2</sup>-test (p<0.0001) followed by pairwise two-sided Fisher's exact test.

(c) Confocal projections of C4da axonal projections in larvae overexpressing high levels of TRPV4<sup>R269C</sup> and either wild type Miro or Miro<sup>T25N</sup>.

(d) Innervation of ipsilateral synaptic hemisegments shown in C. n= 9 larvae per genotype. Mean ± SEM. One-way ANOVA(p<0.0001), Tukey's *post hoc* test Scale bar, 25 μm in B and C. For all panels: \*\*=p<0.01, \*\*\*=p<0.001, \*\*\*\*=p<0.0001

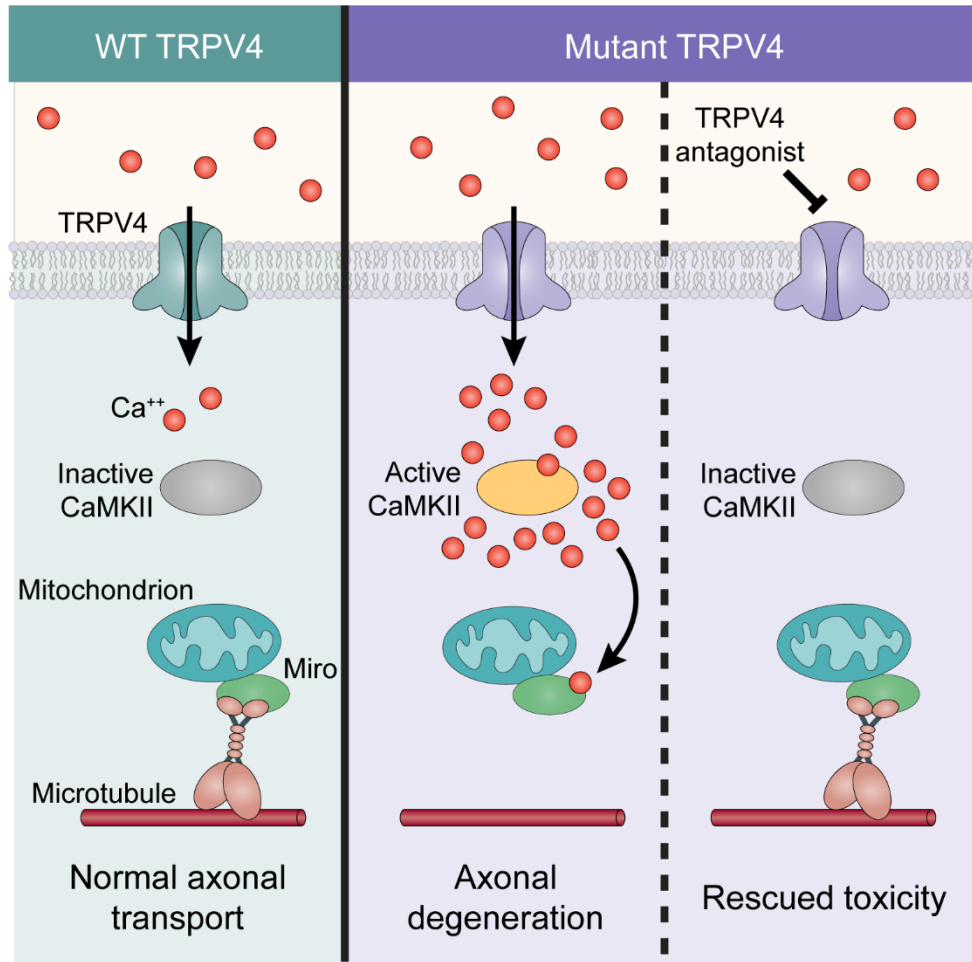

**Supplementary Figure 13. Model of TRPV4-mediated neurotoxicity.** Activation of TRPV4, which is more rapid in the case of neuropathogenic mutants, causes an increase in intracellular  $\text{Ca}^{2+}$  that is dependent on CaMKII. This increase in intracellular  $\text{Ca}^{2+}$  disrupts mitochondrial transport by increasing the stationary pool of mitochondria. Additionally, TRPV4-mediated  $\text{Ca}^{2+}$  influx causes axonal degeneration which is enhanced by the mitochondrial transport protein Miro in a manner dependent on Miro binding to  $\text{Ca}^{2+}$ . This implies a  $\text{Ca}^{2+}$ -dependent relationship between mitochondrial axon transport machinery and axonal degeneration. Genetic or pharmacologic blockade of either TRPV4 or CaMKII activity prevents TRPV4-mediated  $\text{Ca}^{2+}$  increases and strongly suppresses axonal degeneration and neuronal dysfunction.
